# Supplementary figures and images for: Projection neurons in Drosophila antennal lobes signal the acceleration of odor concentrations
Source: eLife journal article supplement (doi:10.7554/elife.06651), 2015-05-14

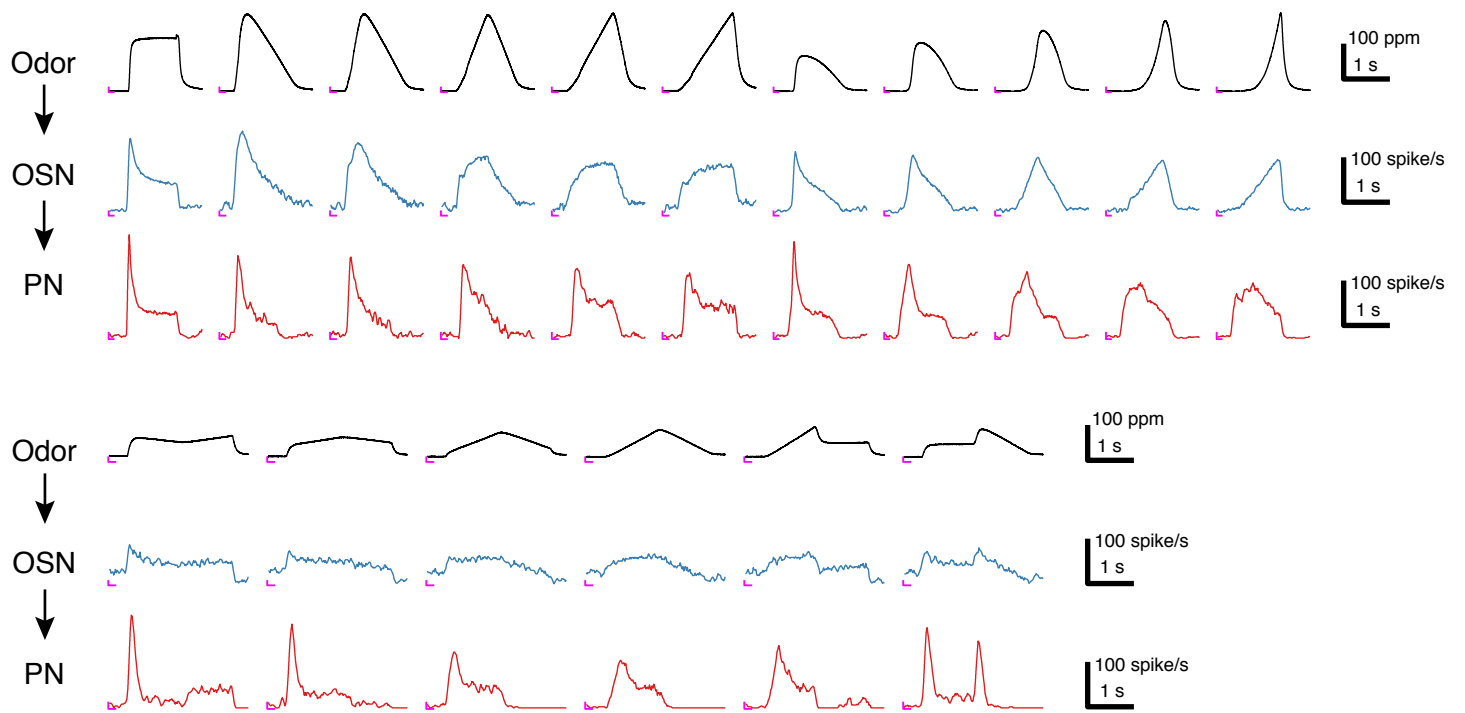

Figure 1 – Figure supplement 1

Supplement: supp [file elife_poa_e06651_Figure_1_figure_supplement_1.pdf › elife_poa_e06651_Figure_1_figure_supplement_1.pdf]

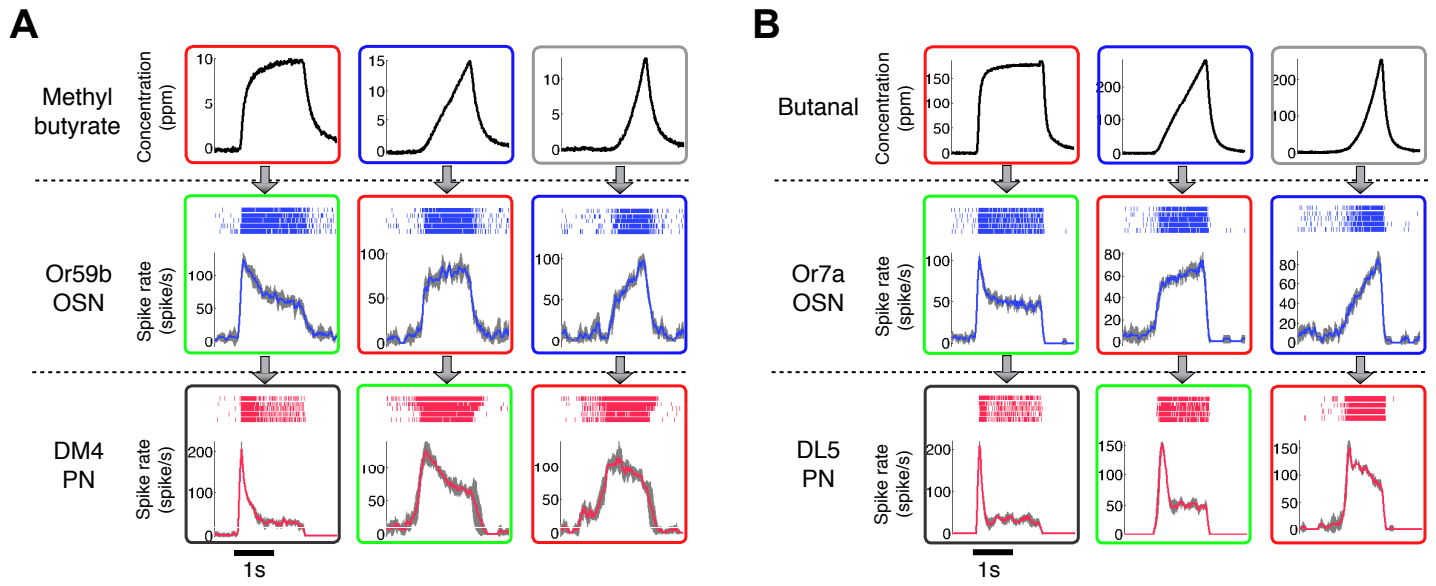

Figure 2 – Figure supplement 1

Supplement: supp [file elife_poa_e06651_Figure_2_figure_supplement_1.pdf › elife_poa_e06651_Figure_2_figure_supplement_1.pdf]

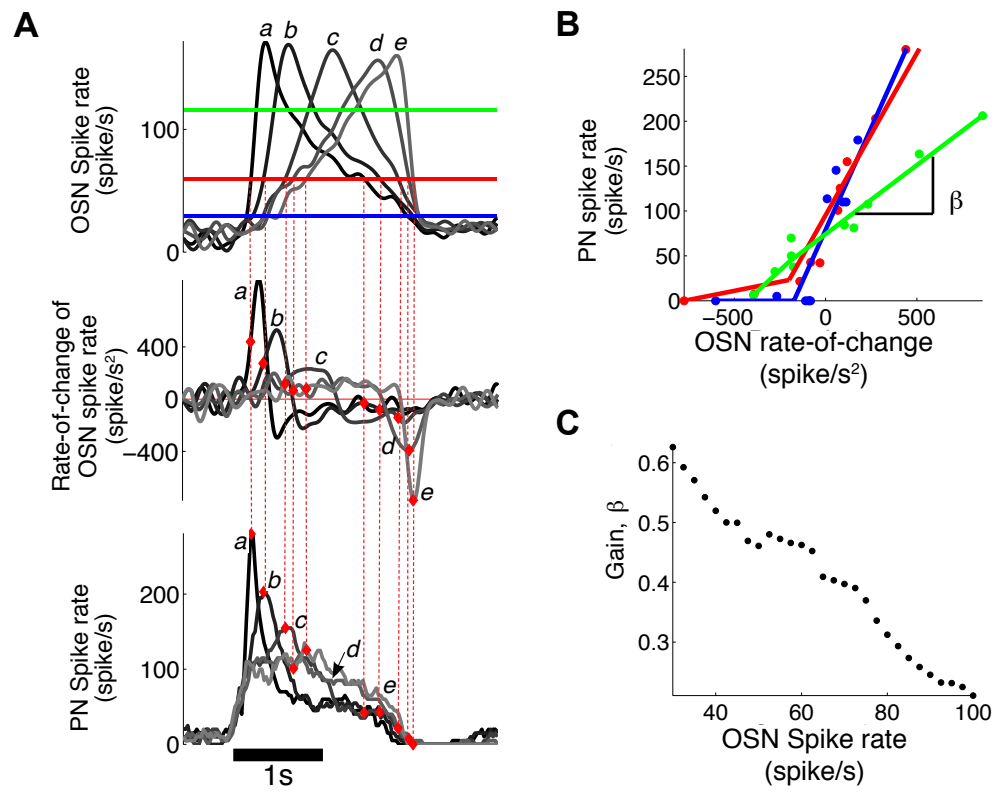

Figure 3 – Figure supplement 1

Supplement: supp [file elife_poa_e06651_Figure_3_figure_supplement_1.pdf › elife_poa_e06651_Figure_3_figure_supplement_1.pdf]
